# Supplementary material for: Growth, characterization, and thin film transistor application of CH3NH3PbI3 perovskite on polymeric gate dielectric layers
Source: Royal Society of Chemistry journal article supplement (doi:10.1039/c7ra08699g), 2017-01-01
Supplement: c7ra08699g1.pdf [file c7ra08699g1.pdf]

## Supplementary Information

### Growth, characterization, and thin film transistor application of $\text{CH}_3\text{NH}_3\text{PbI}_3$ perovskite on polymeric gate dielectric layers

Jenner H.L. Ngai,<sup>‡*a,b*</sup> Johnny K.W. Ho,<sup>‡*a*</sup> Rocky K.H. Chan,<sup>*a*</sup> S.H. Cheung,<sup>*a*</sup> Louis M. Leung<sup>*b*</sup>  
and S.K. So<sup>*a\**</sup>

<sup>*a*</sup> Department of Physics and Institute for Advanced Materials, Hong Kong Baptist University, Kowloon Tong, Hong Kong, China.

<sup>*b*</sup> Department of Chemistry, Hong Kong Baptist University, Kowloon Tong, Hong Kong, China.

<sup>‡</sup> Authors with equal contribution.

\* Corresponding author. Email: skso@hkbu.edu.hk

#### 1. Grazing incidence X-ray diffraction (GIXRD) analysis

Grazing incidence X-ray diffraction (GIXRD) measurements were carried out to investigate the crystallinity and microstructure of the perovskite thin films. Fig. S1 shows the grazing incidence X-ray diffraction (GIXRD) pattern of the  $\text{CH}_3\text{NH}_3\text{PbI}_3$  film on different polymers. Strong peaks were observed at  $2\theta = 14.1^\circ$ ,  $28.4^\circ$  and  $31.9^\circ$ , associated to the (110), (220) and (310) diffractions of  $\text{CH}_3\text{NH}_3\text{PbI}_3$  respectively. The peaks indicated that the organo-lead halide perovskite films possessed high crystallinity. The absence of the diffraction peak at  $12.7^\circ$  showed that the samples were free from the starting material  $\text{PbI}_2$ , which in other words indicated the reactions were driven to completeness during the formation of perovskite crystals.

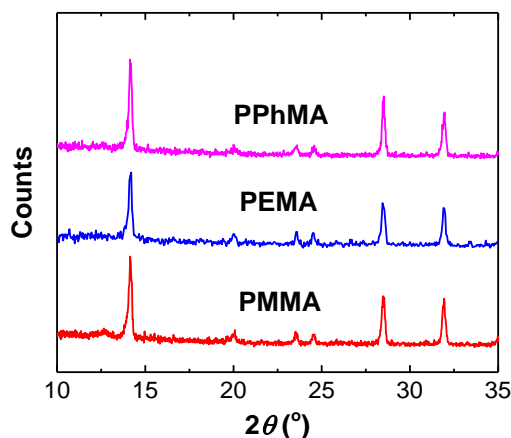

Fig. S1 GIXRD pattern of  $\text{CH}_3\text{NH}_3\text{PbI}_3$  perovskite films grown on different polymer substrate surfaces.
